# Supplementary material for: Molecularly Imprinted Polymers Exhibit Low Cytotoxic and Inflammatory Properties in Macrophages In Vitro
Source: MDPI journal article supplement (doi:10.3390/app12126091), 2022-06-15
Supplement: s1 [file s1]

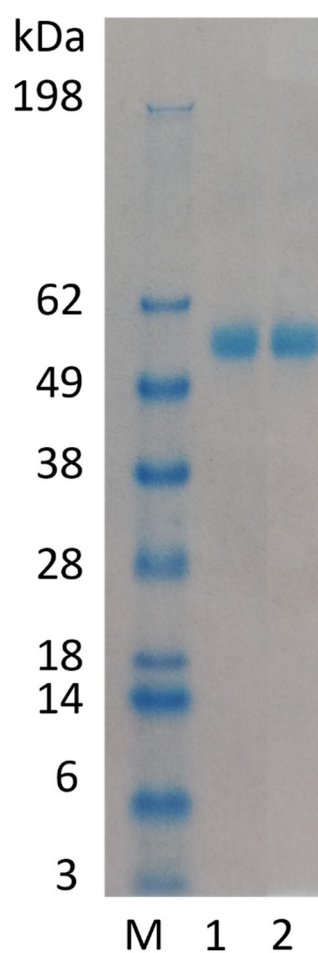

**Figure S3. SDS-PAGE analysis.** SDS-PAGE analysis of protein adsorption of SA-MIPs and serum proteins. M indicates protein molecular standard. Lane 1, 100 µg/ml SA-MIP; Lane 2, 400 µg/ml SA-MIPs. Both SA-MIP concentrations have been incubated with R10 culture medium overnight prior to further analysis.
